# Supplementary material for: Degradation of YRA1 Pre-mRNA in the Cytoplasm Requires Translational Repression, Multiple Modular Intronic Elements, Edc3p, and Mex67p
Source: PubMed Central journal article supplement (PMC2864733; doi:10.1371/journal.pbio.1000360), 2010-04-27
Supplement: pbio.1000360.s010.pdf [file pbio.1000360.s010.pdf]

| Name   | Allele                      | Description                                                                                  |
|--------|-----------------------------|----------------------------------------------------------------------------------------------|
| SYE74  | pRS314-YRA1(XhoI-SacI)      | Contains wild-type YRA1 allele as a 2.2 kb XhoI-SacI fragment                                |
| SYE444 | pRS314-YRA1-N-942(F16N)     | Same as SYE74 but contains an internal deletion from nt 943 to the 3' end of the YRA1 intron |
| SYE495 | pRS314-YRA1-N-852(NR9-F16N) | Same as SYE74 but contains an internal deletion from nt 853 to the 3' end of the YRA1 intron |
| SYE493 | pRS314-YRA1-N-772(NR7-F16N) | Same as SYE74 but contains an internal deletion from nt 772 to the 3' end of the YRA1 intron |
| SYE521 | pRS314-YRA1-N-753(R6A-F16N) | Same as SYE74 but contains an internal deletion from nt 754 to the 3' end of the YRA1 intron |
| SYR568 | pRS314-YRA1-N-742(R6C-F16N) | Same as SYE74 but contains an internal deletion from nt 745 to the 3' end of the YRA1 intron |
| SYE491 | pRS314-YRA1-N-712NR5-F16N)  | Same as SYE74 but contains an internal deletion from nt 712 to the 3' end of the YRA1 intron |
| SYE487 | pRS314-YRA1-N-542(NR1-F16N) | Same as SYE74 but contains an internal deletion from nt 544 to the 3' end of the YRA1 intron |
| SYE401 | pRS314-YRA1-N-400(F16)      | Same as SYE74 but contains an internal deletion from nt 400 to the 3' end of the YRA1 intron |
| SYE436 | pRS314-YRA1-N-372(F16-R3)   | Same as SYE74 but contains an internal deletion from nt 373 to the 3' end of the YRA1 intron |
| SYE434 | pRS314-YRA1-N-342(F16-R2)   | Same as SYE74 but contains an internal deletion from nt 343 to the 3' end of the YRA1 intron |
| SYE403 | pRS314-YRA1-N-311(F16-R1)   | Same as SYE74 but contains an internal deletion from nt 313 to the 3' end of the YRA1 intron |
| SYE442 | pRS314-YRA1-C-395(R4)       | Same as SYE74 but contains an internal deletion from the 5' end of the YRA1 intron to nt 396 |
| SYE497 | pRS314-YRA1-C-543(R4-F1)    | Same as SYE74 but contains an internal deletion from the 5' end of the YRA1 intron to nt 543 |
| SYE648 | pRS314-YRA1-C-548(R4-F1C)   | Same as SYE74 but contains an internal deletion from the 5' end of the YRA1 intron to nt 548 |
| SYE564 | pRS314-YRA1-C-553(R4-F1A)   | Same as SYE74 but contains an internal deletion from the 5' end of the YRA1 intron to nt 552 |
| SYE650 | pRS314-YRA1-C-559(R4-F1D)   | Same as SYE74 but contains an internal deletion from the 5' end of the YRA1 intron to nt 558 |
| SYE566 | pRS314-YRA1-C-565(R4-F1B)   | Same as SYE74 but contains an internal deletion from the 5' end of the YRA1 intron to nt 564 |
| SYE611 | pRS314-YRA1-C-625(R4-F14A)  | Same as SYE74 but contains an internal deletion from the 5' end of the YRA1 intron to nt 624 |
| SYE614 | pRS314-YRA1-C-637(R4-F14B)  | Same as SYE74 but contains an internal deletion from the 5' end of the YRA1 intron to nt 636 |
| SYE503 | pRS314-YRA1-C-648R4-F15)    | Same as SYE74 but contains an internal deletion from the 5' end of the YRA1 intron to nt 648 |
| SYE616 | pRS314-YRA1-C-660(R4-F15A)  | Same as SYE74 but contains an internal deletion from the 5' end of the YRA1 intron to nt 660 |
| SYE618 | pRS314-YRA1-C-672(R4-F15B)  | Same as SYE74 but contains an internal deletion from the 5' end of the YRA1 intron to nt 672 |

|        |                               |                                                                                                                     |
|--------|-------------------------------|---------------------------------------------------------------------------------------------------------------------|
| SYE654 | pRS314-YRA1-C-678(R4-F15C)    | Same as SYE74 but contains an internal deletion from the 5' end of the YRA1 intron to nt 678                        |
| SYE477 | pRS314-YRA1-C-683R4-F2)       | Same as SYE74 but contains an internal deletion from the 5' end of the YRA1 intron to nt 684                        |
| SYE479 | pRS314-YRA1-C-713(R4-F5)      | Same as SYE74 but contains an internal deletion from the 5' end of the YRA1 intron to nt 714                        |
| SYE481 | pRS314-YRA1-C-773(R4-F7)      | Same as SYE74 but contains an internal deletion from the 5' end of the YRA1 intron to nt 774                        |
| SYE483 | pRS314-YRA1-C-853(R4--F9)     | Same as SYE74 but contains an internal deletion from the 5' end of the YRA1 intron to nt 852                        |
| SYE485 | pRS314-YRA1-C-943(R4-F12)     | Same as SYE74 but contains an internal deletion from the 5' end of the YRA1 intron to nt 942                        |
| SYE830 | pRS314-YRA1-R-AC(AR3-F2-NR6C) | Same as SYE74 but contains internal deletions from nts 373-672 and nt 744 to the 3' end of the YRA1 intron          |
| SYE558 | pRS314-YRA1-R-BC(I-F1A-R6A)   | Same as SYE74 but contains internal deletions from the 5' end to nt 552 and nt 754 to the 3' end of the YRA1 intron |
| SYE764 | pRS314-YRA1-R-BCD(I-F1-F16N)  | Same as SYE74 but contains internal deletions from the 5' end to nt 542 and nt 942 to the 3' end of the YRA1 intron |
| SYE646 | pRS314-YRA1-R-CD(I-F15B-F16N) | Same as SYE74 but contains internal deletions from the 5' end to nt 672 and nt 942 to the 3' end of the YRA1 intron |
| SYE585 | pRS314-YRA1-SL31              | Same as SYE74 but contains a stem-loop structure 31 nucleotides downstream from the YRA1 transcription start site   |
| SYE125 | pRS314-YRA1-F7                | Same as SYE74 but contains an internal deletions from nts 400-774                                                   |
| SYE591 | pRS314-YRA1-SL31-N-400(F16)   | Same as SYE401 but contains a stem-loop structure 31 nucleotides downstream from the YRA1 transcription start site  |
| SYE603 | pRS314-YRA1-SL31-C-773(R4-F7) | Same as SYE487 but contains a stem-loop structure 31 nucleotides downstream from the YRA1 transcription start site  |
| SYE374 | pRS314-YRA1-R1-F7             | Same as SYE74 but contains internal deletions from nts 312-774                                                      |
| SYE710 | pRS314-YRA1-F7-MS2            | Same as SYE125 but contains two MS2 binding sites between the intron deletion sites                                 |
| SYE389 | pRS314-YRA1-R1-F7-MS2         | Same as SYE374 but contains two MS2 binding sites between the intron deletion sites                                 |
| SYE725 | pRS314-YRA1-R1-F12-MS2        | Same as SYE135 but contains two MS2 binding sites between the intron deletion sites                                 |
| SYE712 | pRS314-YRA1-N400-MS2          | Same as SYE401 but contains two MS2 binding sites between the intron deletion sites                                 |
| SYE393 | pRS315-ADH1p-MS2p-Mex67p      | Coding sequences of Mex67p fused to MS2-coat protein under the control of the ADH1 promoter                         |
| SYE454 | pRS315-ADH1p-MS2p-Sub2p       | Coding sequences of Sub2p fused to MS2-coat protein under the control of the ADH1 promoter                          |
| SYE686 | pRS314-HA-MEX67               | contains the HA-tagged MEX67 allele                                                                                 |
| SYE541 | pRS314-YRA1-I-R4-NR6A         | Same as SYE74 but contains an internal deletions from nts 286-394 and nt 754 to the 3' end of the YRA1 intron       |

|         |                             |                                                                                                               |
|---------|-----------------------------|---------------------------------------------------------------------------------------------------------------|
| SYE543  | pRS314-YRA1-I-R4-NR6B       | Same as SYE74 but contains an internal deletions from nts 286-394 and nt 734 to the 3' end of the YRA1 intron |
| SYE539  | pRS314-YRA1-I-R4-NR5        | Same as SYE74 but contains an internal deletions from nts 286-394 and nt 714 to the 3' end of the YRA1 intron |
| SYE537  | pRS314-YRA1-I-R4-NR2        | Same as SYE74 but contains an internal deletions from nts 286-394 and nt 684 to the 3' end of the YRA1 intron |
| SYE549  | pRS314-YRA1-I-F1-R6A        | Same as SYE74 but contains an internal deletions from nts 286-542 and nt 754 to the 3' end of the YRA1 intron |
| SYE560  | pRS314-YRA1-I-F1B-R6A       | Same as SYE74 but contains an internal deletions from nts 286-564 and nt 754 to the 3' end of the YRA1 intron |
| SYE547  | pRS314-YRA1-I-F13-R6A       | Same as SYE74 but contains an internal deletions from nts 286-577 and nt 754 to the 3' end of the YRA1 intron |
| SYE107  | pRS314-YRA1-R1              | Same as SYE74 but contains internal deletions from nts 312-394                                                |
| SYE171  | pRS314-YRA1-R2              | Same as SYE74 but contains internal deletions from nts 342-394                                                |
| SYE173  | pRS314-YRA1-R3              | Same as SYE74 but contains internal deletions from nts 372-394                                                |
| SYE99   | pRS314-YRA1-F1              | Same as SYE74 but contains internal deletions from nts 400-542                                                |
| SYE175  | pRS314-YRA1-F13             | Same as SYE74 but contains internal deletions from nts 400-577                                                |
| SYE177  | pRS314-YRA1-F14             | Same as SYE74 but contains internal deletions from nts 400-612                                                |
| SYE179  | pRS314-YRA1-F15             | Same as SYE74 but contains internal deletions from nts 400-647                                                |
| SYE121  | pRS314-YRA1-F5              | Same as SYE74 but contains internal deletions from nts 400-712                                                |
| SYE123  | pRS314-YRA1-F6              | Same as SYE74 but contains internal deletions from nts 400-743                                                |
| SYE127  | pRS314-YRA1-F8              | Same as SYE74 but contains internal deletions from nts 400-797                                                |
| SYE135  | pRS314-YRA1-F12             | Same as SYE74 but contains internal deletions from nts 400-943                                                |
| SYE1103 | pRS314-HA-YRA1-C672(R4-15B) | Same as SYE 618 but contains HA tag at the beginning of YRA1 exon1                                            |
| SYE1105 | pRS314-HA-YRA1-C773(R4-F7)  | Same as SYE 481 but contains HA tag at the beginning of YRA1 exon1                                            |
| SYE1107 | pNOPGFP-MTR2                | From Dr. Ed Hurt                                                                                              |
| SYE1108 | pRS315-mtr2-9               | From Dr. Ed Hurt                                                                                              |
| SYE1109 | pRS315-mtr2-21              | From Dr. Ed Hurt                                                                                              |
| SYE1110 | pRS315-mtr2-26              | From Dr. Ed Hurt                                                                                              |

---
