# Supplementary material for: Degradation of YRA1 Pre-mRNA in the Cytoplasm Requires Translational Repression, Multiple Modular Intronic Elements, Edc3p, and Mex67p
Source: PubMed Central journal article supplement (PMC2864733; doi:10.1371/journal.pbio.1000360), 2010-04-27
Supplement: pbio.1000360.s011.pdf [file pbio.1000360.s011.pdf]

| Name          | Sequences                              |
|---------------|----------------------------------------|
| YRA1-3        | ACTTGAAGAACTATAAAAAGGCCGC              |
| YRA1-4        | GTGTGCCATATCCTTCCTTACAAA               |
| YRA1-5        | GTATGTTAATACGTGAAATGAGAGCT             |
| YRA1-6        | GAGTTGCCAAGCTCTTGGACACCACTA            |
| YRA1-7        | TCATGAAAGACATGTTTCCCATAGCTA            |
| YRA1-p1       | AGCTCTCATTTACGTATTAACATAC              |
| YRA1-BglII-F  | ACCTAGATCTGCTAAATGTCTGCTAACTTAGATA     |
| YRA1-BglII-R  | TAGCAGATCTAGGTATTTTCTTAATATGGATTCTTA   |
| YRA1-StyI-R   | TGCTTAATGTCCCTTGGCAAACCTTCG            |
| YRA1-DU-R2    | TAGCAGATCTTTATCTATTTGTCTTCGATAGTTTTCG  |
| YRA1-DI-5'    | GATCGAATTCCTCCTTGATTGTTTGTGATTGTCC     |
| YRA1-DI-F1    | GATCGAATTCAGAATGGGTTTGTCTTATTGGCTG     |
| YRA1-DI-F1A   | GATCGAATTCGTCTTATTGGCTGGGTTAACTCAAAT   |
| YRA1-DI-F1B   | GATCGAATTCCTGGGTTAACTCAAATCAATCTGACTAT |
| YRA1-DI-F1C   | GATCGAATTCGGGTTTGTCTTATTGGCTGGGTTAAC   |
| YRA1-DI-F1D   | GATCGAATTCATTGGCTGGGTTAACTCAAATCAATC   |
| YRA1-DI-F2    | GATCGAATTCCTCAACTGAAGTTGTGGAAGGATC     |
| YRA1-DI-F5    | GATCGAATTCATTTTGTATCCTTTCAAGAGGGAGT    |
| YRA1-DI-F6    | GATCGAATTCCTCAGTTTGAATGGCACCATTTTCA    |
| YRA1-DI-F7    | GATCGAATTCCTAGCTATGGGAAACATGTCTTTCAT   |
| YRA1-DI-F9    | GATCGAATTCAAAATATTTGATTTGAGACACCTAA    |
| YRA1-DI-F12   | GATCGAATTCATGGTATACTTTTAATACTCTCAA     |
| YRA1-DI-F13   | GATCGAATTCATCAATCTGACTATCTGCTAATCT     |
| YRA1-DI-F14   | GATCGAATTCATTTTAAAGCTGGCGTATTGTGTC     |
| YRA1-DI-F14A  | GATCGAATTCGGCGTATTGTGTCGCCTCGACCGTGATA |
| YRA1-DI-F14B  | GATCGAATTCGCCTCGACCGTGATAGTTAGTTCCTAT  |
| YRA1-DI-F15   | GATCGAATTCCTGATAGTTAGTTCCTATTTTAATA    |
| YRA1-DI-F15A  | GATCGAATTCCTATTTTAAATAAGCGTATCATCCAAT  |
| YRA1-DI-F15B  | GATCGAATTCAGCGTATCATCCAATACTGAAGTTGTG  |
| YRA1-DI-F15C  | GATCGAATTCATCATCCAATACTGAAGTTGTGGAAGG  |
| YRA1-DI-F16N  | TACGCCATGGGAATTTTTTGCATCTCAAGTAGGTGGTG |
| YRA1-DI-F16   | GATCGAATTCGAATTTTTTGCATCTCAAGTAGGTGGTG |
| YRA1-DI-3'    | AATCTTGATCTGCCTCCATCGATTG              |
| YRA1-DI-R1    | GATCGAATTCAGCTCTCATTTACGTATTAACATA     |
| YRA1-DI-R2    | GATCGAATTCCTTAGTTACTCGCATCGTCTCGTGTG   |
| YRA1-DI-R3    | GATCGAATTCGAGAAATATTCTTTGTAAGGAAGGA    |
| YRA1-DI-R4    | GATCGAATTCCTTACAGCATCCTGCTTAATGTCC     |
| YRA1-R4-BamHI | TACGGGATCCTTTACAGCATCCTGCTTAATGTCC     |
| YRA1-EcoRI-F  | GATCAAGAATTCCTTTTTAGAGATGAA            |
| YRA1-NcoI-F   | TACGCCATGGTATACTTTTAATACTCTCAACTC      |
| YRA1-NcoI-R   | TATACCATGGCGTAGGAAAAATAAACCCCTCAAATAA  |
| YRA1-NcoI-R9  | TACGCCATGGTGTAACTATCATAATAAAAAATGAAG   |
| YRA1-NcoI-R7  | TACGCCATGGTTTTTGAATGGTGCCATTCGAAAC     |
| YRA1-NcoI-R5  | TACGCCATGGTAATTGATCCTTCCACAACCTTCAGTAT |
| YRA1-NcoI-R2  | TACGCCATGGATGATACGCTTATTAATAATAGGAACT  |
| YRA1-NcoI-R1  | TACGCCATGGCAGTGGTAGCTGGTAATTC AACCTTA  |
| YRA1-NcoI-R6A | TACGCCATGGTCGAAACTGAAAGCTACTCCCTCTTGA  |
| YRA1-NcoI-R6B | TACGCCATGGCTCTTGAAGGATACAAAATTAATTGA   |

|                 |                                                                    |
|-----------------|--------------------------------------------------------------------|
| YRA1-NcoI-R6C   | TACGCCATGGAAGCTACTCCCTCTTGAAAGGATACAAA                             |
| YRA1-SL31-F     | GATCGGATCCCGCGGTTTCGCCGCGGGATCTAAAAATCTCCCTCGTTCTATTTGAAACTTT      |
| YRA1-SL31P      | GCGGCGAACCGCGGGATCTTTATCTAT                                        |
| YRA1-MS2-I-R    | GATCGAATTCGATGGATCCAGCTCTCATTTACGTATTAACATACTCTT                   |
| MS2-BamH-EcoR-F | GATCCAAAGTTGAGGATCACCCAAGTGTGCAGGTCGAGACTAGAAAAGTTGAGGATCACCCAAGT  |
| MS2-BamH-EcoR-R | AATTCAGTTGGGTGATCCTCAACTTTTCTAGTCTCGACCTGCACAGTTGGGTGATCCTCAACTTTG |
| YRA1-BamHI-R    | GATCGGATCCTTGATCAAAAGCGTGTGCCATATCCTTC                             |
| YRA1-RTF1       | AGCCTTCCAAACAGAAGAGGCCCTATC                                        |
| YRA1-RTR1       | AAGTATTTGCGACTCTTTCTTCATCTC                                        |
| CYH2-RTF1       | AAGACTAGAAAAGCACAGAGGTCACGTC                                       |
| CYH2-RTR1       | AGTATGACAAAGGCTATGCACACTTTC                                        |
| MS2-MEX67-F     | GATCGCGGCCGCGCTAGCATGAGCGGATTTACAATGTTGGAATA                       |
| MS2-MEX67-R     | GATCGTCGACGAGCTCATCAAAAGCTCTCTTAGATCTTTGAA                         |
| MEX67-5UTR-F    | GATCGCGGCCGCGAGCGATGCAGATGTGTATAAAACTGTCA                          |
| MEX67-5UTR-R    | GATCCCATGGTTTTTTTGGCTGCTATTAGCGATGCAGAATT                          |
| MEX67-F-S1      | CAGAGATTGTCAATCGGGCAAGAGTCC                                        |
| MEX67-F-S2      | GACAACCAACTTAAGGACATCTCAGCA                                        |
| SUB2-MS2-F      | GATCGCGGCCGCGCTAGCATGTACACGAAGGTGAAGAAGATTTAT                      |
| SUB2-MS2-R      | GATCGTCGACTCTAGATTCCAAAAATCTTACCGTTAAGAA                           |
| YRA1-NotI       | GATCGCGGCCGCGCTCGAGGGTATATTAAGCTATTTTACCACT                        |
| YRA1-HA-NcoI-R  | GATCCCATGGTTAGCAGATGTAGGATTTTCTTAATAT                              |
| YRA1-Nhe-F      | CGGTGCTAGCATGGCTAACTTAGATAAATCCTTAGACGAAATC                        |

---
